# Supplementary material for: Factors associated with COVID-19 vaccine uptake in people with kidney disease: an OpenSAFELY cohort study
Source: HighWire-hosted journal article supplement (doi:10.1136/bmjopen-2022-066164), 2023-01-01
Supplement: bmjopen-2022-066164supp001_data_supplement.pdf [file bmjopen-2022-066164supp001_data_supplement.pdf]

## Supplementary Appendix

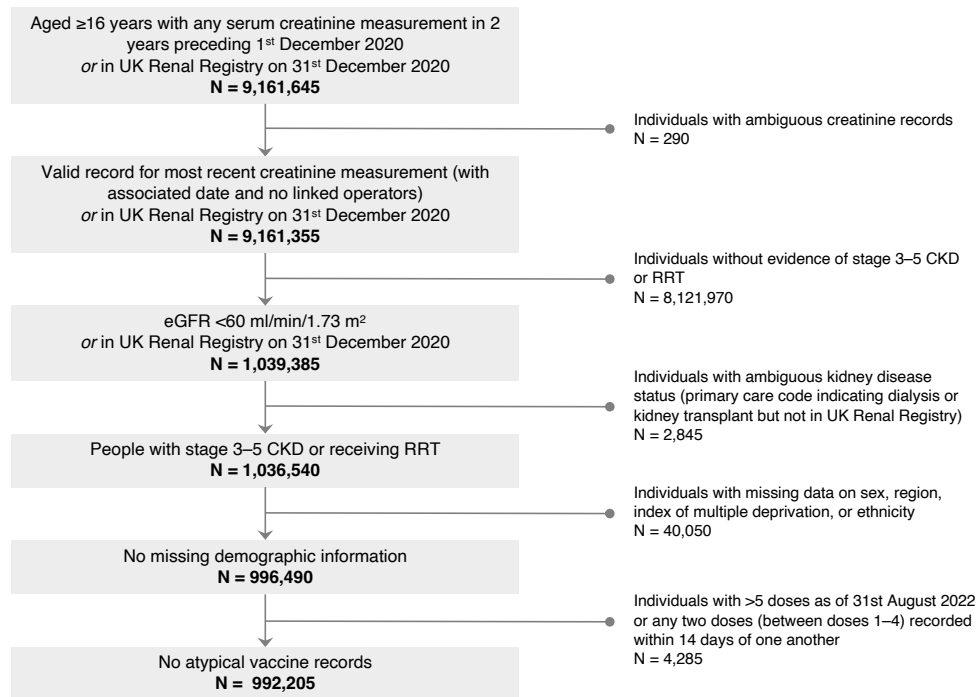

**Supplementary Figure 1. Flow chart of study eligibility.** Frequencies are rounded to the nearest 5. CKD, chronic kidney disease; eGFR, estimated glomerular filtrate rate; RRT, renal replacement therapy.

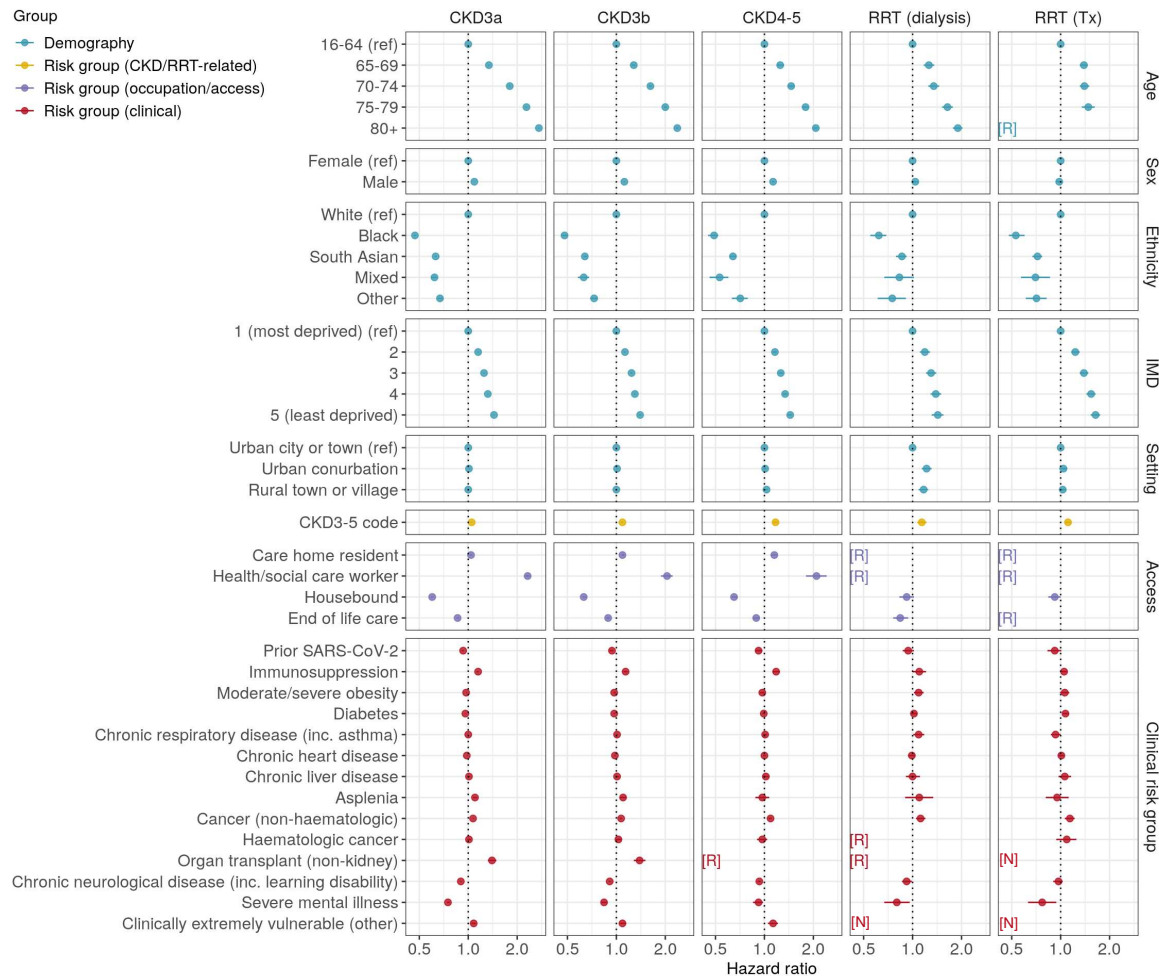

**Supplementary Figure 2. Factors associated with completion of a 3-dose vaccine series in kidney disease subgroups.** Hazard ratios and 95% confidence intervals were derived from partially adjusted models that included age, care home residence, health and social care worker status, housebound status, receipt of end-of-life care, setting (urban/rural), sex, ethnicity, IMD quintile, prior SARS-CoV-2 infection, immunosuppression, and haematologic cancer. Data are redacted [R] for any rows in which there were >0 and ≤10 event or non-event counts after rounding to the nearest 5, with non-event counts calculated among uncensored individuals. CKD, chronic kidney disease; IMD, index of multiple deprivation; [N], covariate absent in all individuals by definition; [R], redacted; RRT, renal replacement therapy; Tx, transplant.

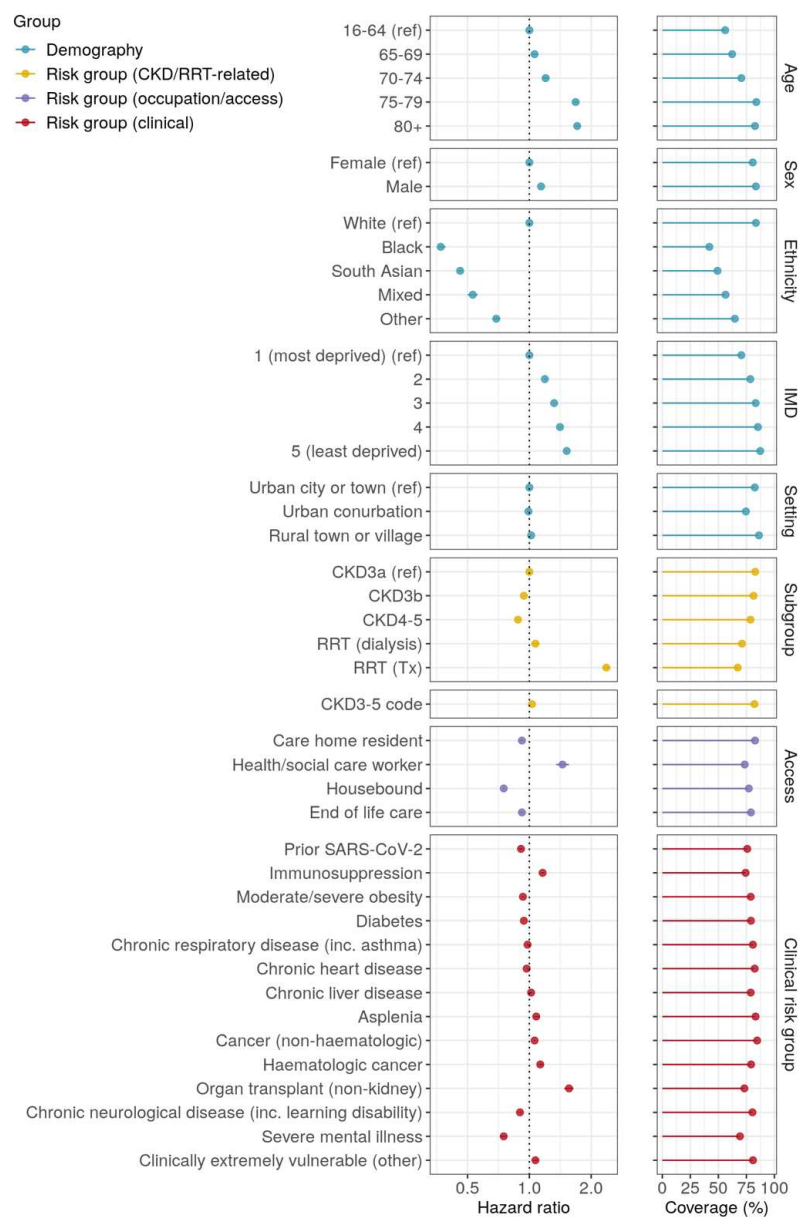

**Supplementary Figure 3. Factors associated with completion of a 4-dose vaccine series in people with kidney disease.** The left-hand panels display hazard ratios and 95% confidence intervals from partially adjusted models that included age, care home residence, health and social care worker status, housebound status, receipt of end-of-life care, setting (urban/rural), sex, ethnicity, IMD quintile, prior SARS-CoV-2 infection, immunosuppression, and haematologic cancer. Confidence intervals are generally too narrow to be visible. See **Supplementary Table 6** for minimally and fully adjusted model outputs. The right-hand panels display the cumulative coverage based on Kaplan-Meier estimates, censoring at death, deregistration, or 31<sup>st</sup> August 2022. CKD, chronic kidney disease; IMD, index of multiple deprivation; RRT, renal replacement therapy; Tx, transplant.

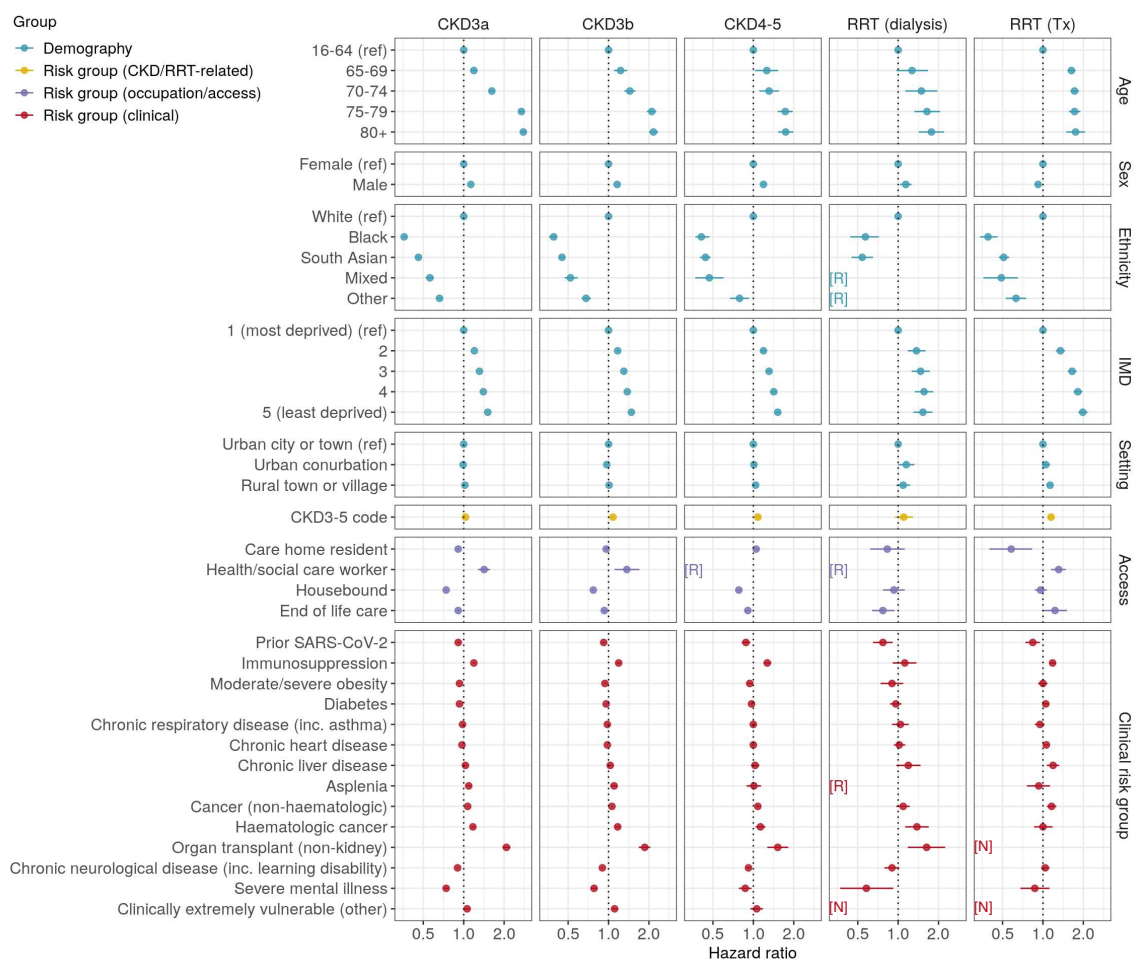

**Supplementary Figure 4. Factors associated with completion of a 4-dose vaccine series in kidney disease subgroups.**

Individuals were included in the analysis if they were  $\geq 75$  years of age at baseline, care home residents, transplant recipients, or had a history of haematologic malignancy or immunosuppression. Hazard ratios and 95% confidence intervals were derived from partially adjusted models that included age, care home residence, health and social care worker status, housebound status, receipt of end-of-life care, setting (urban/rural), sex, ethnicity, IMD quintile, prior SARS-CoV-2 infection, immunosuppression, and haematologic cancer. Data are redacted [R] for any rows in which there were  $>0$  and  $\leq 10$  event or non-event counts after rounding to the nearest 5, with non-event counts calculated among uncensored individuals. CKD, chronic kidney disease; IMD, index of multiple deprivation; [N], covariate absent in all individuals by definition; [R], redacted; RRT, renal replacement therapy; Tx, transplant.

Supplementary Table 1. Product profile by dose.

| Subgroup                          | Dose 1, n (%)  | Dose 2, n (%)  | Dose 3, n (%)  | Dose 4, n (%)  |
|-----------------------------------|----------------|----------------|----------------|----------------|
| <b>N</b>                          | 944,605 (100)  | 922,365 (100)  | 849,150 (100)  | 535,975 (100)  |
| <b>Product</b>                    |                |                |                |                |
| BNT                               | 504,980 (53.5) | 495,375 (53.7) | 779,740 (91.8) | 216,435 (40.4) |
| AZ                                | 438,890 (46.5) | 425,820 (46.2) | 1,965 (0.2)    | 200 (0.0)      |
| MOD                               | 735 (0.1)      | 1,170 (0.1)    | 67,445 (7.9)   | 319,340 (59.6) |
| <b>2-dose product combination</b> |                |                |                |                |
| BNT-BNT                           | –              | 492,105 (53.4) | –              | –              |
| AZ-AZ                             | –              | 422,145 (45.8) | –              | –              |
| BNT-AZ                            | –              | 3,675 (0.4)    | –              | –              |
| AZ-BNT                            | –              | 3,215 (0.3)    | –              | –              |
| Other                             | –              | 1,225 (0.1)    | –              | –              |
| <b>3-dose product combination</b> |                |                |                |                |
| BNT-BNT-BNT                       | –              | –              | 438,905 (51.7) | –              |
| AZ-AZ-BNT                         | –              | –              | 336,725 (39.7) | –              |
| AZ-AZ-MOD                         | –              | –              | 44,430 (5.2)   | –              |
| BNT-BNT-MOD                       | –              | –              | 21,970 (2.6)   | –              |
| BNT-AZ-BNT                        | –              | –              | 2,575 (0.3)    | –              |
| AZ-AZ-AZ                          | –              | –              | 1,720 (0.2)    | –              |
| AZ-BNT-BNT                        | –              | –              | 1,320 (0.2)    | –              |
| Other                             | –              | –              | 1,510 (0.2)    | –              |

Frequencies are rounded to the nearest 5. Any product combinations given to <1000 individuals were pooled as 'Other'. AZ, ChAdOx1-S (AstraZeneca); BNT, BNT162b2 (Pfizer-BioNTech); MOD, mRNA-1273 (Moderna).

Supplementary Table 2. Cox proportional hazards model and logistic regression outputs for factors associated with completion of a 3-dose vaccination series in people with kidney disease.

| Variable                                     | Cox models        |          |                                 |                                 |                             | Logistic regression |                                 |
|----------------------------------------------|-------------------|----------|---------------------------------|---------------------------------|-----------------------------|---------------------|---------------------------------|
|                                              | N (n events)      | Cov. (%) | HR (95% CI), minimally adjusted | HR (95% CI), partially adjusted | HR (95% CI), fully adjusted | N (n events)        | OR (95% CI), partially adjusted |
| <b>Age</b>                                   |                   |          |                                 |                                 |                             |                     |                                 |
| 16–64 (ref)                                  | 109,815 (89,610)  | 84.7     | 1.00                            | 1.00                            | 1.00                        | 103,215 (87,745)    | 1.00                            |
| 65–69                                        | 74,740 (65,845)   | 91.9     | 1.32 (1.31-1.34)                | 1.28 (1.27-1.29)                | 1.31 (1.30-1.32)            | 69,495 (64,110)     | 1.85 (1.79-1.92)                |
| 70–74                                        | 143,575 (129,880) | 94.8     | 1.76 (1.75-1.78)                | 1.67 (1.66-1.69)                | 1.71 (1.70-1.73)            | 132,385 (125,905)   | 2.67 (2.59-2.75)                |
| 75–79                                        | 181,200 (163,730) | 95.8     | 2.20 (2.18-2.21)                | 2.09 (2.07-2.11)                | 2.15 (2.14-2.17)            | 162,940 (156,740)   | 3.38 (3.27-3.49)                |
| 80+                                          | 482,870 (399,765) | 95.5     | 2.47 (2.45-2.49)                | 2.45 (2.44-2.47)                | 2.56 (2.54-2.58)            | 370,940 (356,715)   | 3.39 (3.30-3.48)                |
| <b>Sex</b>                                   |                   |          |                                 |                                 |                             |                     |                                 |
| Female (ref)                                 | 555,365 (476,420) | 93.7     | 1.00                            | 1.00                            | 1.00                        | 473,535 (445,645)   | 1.00                            |
| Male                                         | 436,840 (372,415) | 94.1     | 1.11 (1.11-1.12)                | 1.10 (1.09-1.10)                | 1.10 (1.09-1.10)            | 365,440 (345,565)   | 1.18 (1.16-1.20)                |
| <b>Ethnicity</b>                             |                   |          |                                 |                                 |                             |                     |                                 |
| White (ref)                                  | 930,565 (805,890) | 95.1     | 1.00                            | 1.00                            | 1.00                        | 785,470 (750,345)   | 1.00                            |
| Black                                        | 17,675 (11,030)   | 66.8     | 0.45 (0.44-0.46)                | 0.48 (0.47-0.48)                | 0.48 (0.47-0.49)            | 15,705 (10,590)     | 0.19 (0.19-0.20)                |
| South Asian                                  | 32,620 (23,560)   | 79.2     | 0.61 (0.60-0.62)                | 0.65 (0.64-0.66)                | 0.65 (0.64-0.66)            | 28,000 (22,365)     | 0.32 (0.31-0.33)                |
| Mixed                                        | 4,755 (3,435)     | 77.5     | 0.60 (0.58-0.62)                | 0.62 (0.60-0.64)                | 0.62 (0.60-0.65)            | 4,215 (3,290)       | 0.29 (0.26-0.31)                |
| Other                                        | 6,590 (4,920)     | 82.2     | 0.68 (0.66-0.70)                | 0.70 (0.68-0.72)                | 0.69 (0.67-0.71)            | 5,585 (4,625)       | 0.33 (0.31-0.36)                |
| <b>IMD</b>                                   |                   |          |                                 |                                 |                             |                     |                                 |
| 1 most deprived (ref)                        | 164,415 (130,595) | 88.1     | 1.00                            | 1.00                            | 1.00                        | 136,680 (121,160)   | 1.00                            |
| 2                                            | 187,240 (156,820) | 92.5     | 1.19 (1.18-1.20)                | 1.15 (1.14-1.16)                | 1.14 (1.14-1.15)            | 157,145 (146,105)   | 1.48 (1.44-1.52)                |
| 3                                            | 224,590 (194,255) | 94.8     | 1.32 (1.31-1.33)                | 1.25 (1.24-1.26)                | 1.24 (1.23-1.25)            | 190,175 (181,085)   | 1.90 (1.84-1.95)                |
| 4                                            | 216,980 (190,310) | 95.8     | 1.40 (1.39-1.42)                | 1.32 (1.31-1.33)                | 1.31 (1.30-1.32)            | 184,545 (177,440)   | 2.18 (2.11-2.25)                |
| 5 least deprived                             | 198,985 (176,855) | 96.7     | 1.53 (1.52-1.54)                | 1.44 (1.43-1.45)                | 1.42 (1.41-1.43)            | 170,425 (165,420)   | 2.74 (2.64-2.83)                |
| <b>Setting</b>                               |                   |          |                                 |                                 |                             |                     |                                 |
| Urban city or town (ref)                     | 530,975 (456,140) | 94.2     | 1.00                            | 1.00                            | 1.00                        | 449,315 (425,415)   | 1.00                            |
| Urban conurbation                            | 204,530 (166,040) | 89.8     | 0.93 (0.93-0.94)                | 1.02 (1.01-1.02)                | 1.01 (1.01-1.02)            | 170,720 (154,285)   | 0.84 (0.82-0.86)                |
| Rural town or village                        | 256,700 (226,650) | 96.3     | 1.08 (1.07-1.09)                | 1.01 (1.00-1.01)                | 1.01 (1.00-1.01)            | 218,940 (211,515)   | 1.18 (1.14-1.21)                |
| <b>Kidney disease subgroup</b>               |                   |          |                                 |                                 |                             |                     |                                 |
| CKD3a (ref)                                  | 659,785 (579,655) | 94.1     | 1.00                            | 1.00                            | 1.00                        | 581,900 (549,290)   | 1.00                            |
| CKD3b                                        | 245,380 (203,490) | 94.3     | 0.92 (0.92-0.93)                | 0.94 (0.93-0.94)                | 0.93 (0.92-0.93)            | 194,630 (184,545)   | 0.95 (0.93-0.97)                |
| CKD4–5                                       | 64,855 (47,985)   | 92.3     | 0.84 (0.83-0.85)                | 0.87 (0.87-0.88)                | 0.86 (0.85-0.87)            | 44,025 (41,015)     | 0.87 (0.83-0.90)                |
| RRT (dialysis)                               | 9,455 (6,925)     | 86.8     | 1.03 (1.00-1.05)                | 1.11 (1.08-1.14)                | 1.09 (1.06-1.11)            | 6,875 (6,015)       | 1.13 (1.04-1.22)                |
| RRT (Tx)                                     | 12,735 (10,780)   | 89.1     | 1.53 (1.50-1.56)                | 1.51 (1.48-1.54)                | 1.48 (1.45-1.51)            | 11,545 (10,340)     | 1.23 (1.15-1.31)                |
| <b>Primary care coding of kidney disease</b> |                   |          |                                 |                                 |                             |                     |                                 |
| CKD diagnostic code                          | 592,520 (507,470) | 94.5     | 1.03 (1.02-1.03)                | 1.04 (1.04-1.04)                | 1.07 (1.06-1.07)            | 494,910 (469,965)   | 1.25 (1.23-1.28)                |
| <b>Risk group (occupation/access)</b>        |                   |          |                                 |                                 |                             |                     |                                 |
| Care home resident                           | 44,470 (28,155)   | 95.9     | 1.02 (1.00-1.03)                | 1.06 (1.05-1.08)                | 1.11 (1.10-1.13)            | 21,100 (20,320)     | 1.25 (1.16-1.35)                |
| Health / social care worker                  | 5,680 (5,245)     | 93.5     | 2.12 (2.06-2.18)                | 2.26 (2.20-2.32)                | 2.24 (2.18-2.30)            | 5,515 (5,165)       | 2.67 (2.38-2.99)                |
| Housebound                                   | 54,600 (38,340)   | 93.4     | 0.60 (0.59-0.60)                | 0.61 (0.61-0.62)                | 0.63 (0.62-0.63)            | 33,090 (31,195)     | 0.85 (0.81-0.90)                |

|                                |                   |      |                  |                  |                  |                   |                  |
|--------------------------------|-------------------|------|------------------|------------------|------------------|-------------------|------------------|
| End of life care               | 40,400 (24,220)   | 93.5 | 0.82 (0.81-0.84) | 0.87 (0.86-0.88) | 0.87 (0.86-0.88) | 19,445 (18,405)   | 0.89 (0.83-0.95) |
| <b>Risk group (clinical)</b>   |                   |      |                  |                  |                  |                   |                  |
| Prior SARS-CoV-2               | 27,835 (19,630)   | 91.7 | 0.88 (0.87-0.90) | 0.93 (0.92-0.94) | 0.94 (0.92-0.95) | 18,470 (17,040)   | 1.02 (0.96-1.08) |
| Immunosuppression              | 56,985 (47,850)   | 94.6 | 1.17 (1.15-1.18) | 1.19 (1.18-1.20) | 1.13 (1.11-1.14) | 46,000 (43,730)   | 1.47 (1.39-1.54) |
| Moderate/severe obesity        | 111,630 (96,740)  | 92.8 | 0.93 (0.93-0.94) | 0.97 (0.96-0.97) | 0.98 (0.97-0.99) | 99,230 (92,410)   | 1.10 (1.07-1.13) |
| Diabetes                       | 275,745 (229,435) | 93.1 | 0.91 (0.90-0.91) | 0.96 (0.95-0.96) | 0.97 (0.96-0.97) | 225,340 (211,050) | 1.09 (1.06-1.11) |
| CRD (inc. asthma)              | 120,935 (98,590)  | 94.5 | 0.98 (0.97-0.98) | 1.00 (0.99-1.01) | 1.00 (1.00-1.01) | 92,980 (88,445)   | 1.08 (1.04-1.11) |
| Chronic heart disease          | 438,965 (366,070) | 94.8 | 0.98 (0.98-0.99) | 0.98 (0.98-0.98) | 0.99 (0.98-0.99) | 348,165 (332,040) | 1.08 (1.05-1.10) |
| Chronic liver disease          | 32,215 (27,010)   | 92.5 | 1.00 (0.99-1.01) | 1.01 (1.00-1.02) | 1.01 (1.00-1.02) | 27,140 (25,240)   | 1.04 (0.99-1.09) |
| Asplenia                       | 8,665 (7,440)     | 94.5 | 1.10 (1.07-1.12) | 1.09 (1.06-1.11) | 1.08 (1.06-1.11) | 7,345 (6,970)     | 1.18 (1.06-1.31) |
| Cancer (non-haematologic)      | 168,840 (141,125) | 95.8 | 1.09 (1.08-1.10) | 1.07 (1.06-1.08) | 1.07 (1.07-1.08) | 133,245 (128,420) | 1.34 (1.30-1.38) |
| Haematologic cancer            | 20,430 (16,740)   | 95.8 | 1.16 (1.14-1.18) | 0.98 (0.96-1.00) | 1.03 (1.01-1.05) | 15,450 (14,895)   | 1.04 (0.94-1.15) |
| Organ transplant (non-kidney)  | 2,190 (1,895)     | 94.3 | 1.45 (1.38-1.51) | 1.36 (1.30-1.43) | 1.41 (1.35-1.48) | 1,880 (1,780)     | 1.68 (1.36-2.07) |
| CND (inc. learning disability) | 163,135 (129,130) | 94.1 | 0.89 (0.88-0.89) | 0.90 (0.90-0.91) | 0.91 (0.90-0.91) | 119,585 (113,255) | 0.92 (0.90-0.95) |
| Severe mental illness          | 12,985 (10,105)   | 87.3 | 0.75 (0.73-0.76) | 0.78 (0.76-0.80) | 0.79 (0.77-0.80) | 10,575 (9,280)    | 0.65 (0.61-0.69) |
| CEV (other)                    | 9,065 (7,790)     | 92.8 | 1.04 (1.02-1.06) | 1.08 (1.06-1.10) | 1.06 (1.04-1.09) | 7,795 (7,265)     | 1.02 (0.93-1.12) |

Cumulative coverage was determined based on Kaplan-Meier estimates, censoring at death, deregistration, or 31<sup>st</sup> August 2022. Logistic regression models included 838,975 individuals who were uncensored (registered and alive) as of the analysis cut-off (31<sup>st</sup> August 2022). Minimally adjusted models included age, care home residence, and health and social care worker status given their use in vaccine prioritisation criteria. Partially adjusted models additionally included housebound status, receipt of end-of-life care, setting, sex, ethnicity, IMD quintile, prior SARS-CoV-2 infection, immunosuppression, and haematologic cancer. Fully adjusted models included all covariates. CI, confidence interval; CKD, chronic kidney disease; HR, hazard ratio; IMD, index of multiple deprivation; OR, odds ratio; RRT, renal replacement therapy; Tx, transplant.

Supplementary Table 3. Cox proportional hazards models for factors associated with completion of a 3-dose vaccination series in kidney disease subgroups.

| Variable                                     | CKD3a    |                  | CKD3b    |                  | CKD4-5   |                  | RRT (dialysis) |                  | RRT (Tx) |                  |
|----------------------------------------------|----------|------------------|----------|------------------|----------|------------------|----------------|------------------|----------|------------------|
|                                              | Cov. (%) | HR (95% CI)      | Cov. (%) | HR (95% CI)      | Cov. (%) | HR (95% CI)      | Cov. (%)       | HR (95% CI)      | Cov. (%) | HR (95% CI)      |
| <b>Age</b>                                   |          |                  |          |                  |          |                  |                |                  |          |                  |
| 16-64 (ref)                                  | 85.1     | 1.00             | 83.1     | 1.00             | 81.4     | 1.00             | 80.8           | 1.00             | 87.2     | 1.00             |
| 65-69                                        | 92.3     | 1.34 (1.32-1.35) | 90.8     | 1.28 (1.24-1.31) | 88.9     | 1.25 (1.19-1.32) | 88.7           | 1.26 (1.17-1.36) | 94.1     | 1.39 (1.31-1.47) |
| 70-74                                        | 95.1     | 1.80 (1.78-1.82) | 94.1     | 1.62 (1.58-1.66) | 91.9     | 1.46 (1.40-1.52) | 91.2           | 1.35 (1.25-1.46) | 94.5     | 1.40 (1.31-1.50) |
| 75-79                                        | 96.0     | 2.28 (2.25-2.30) | 95.4     | 2.00 (1.96-2.05) | 94.0     | 1.79 (1.72-1.86) | 95.0           | 1.64 (1.52-1.77) | 94.3     | 1.48 (1.35-1.62) |
| 80+                                          | 95.7     | 2.72 (2.70-2.75) | 95.4     | 2.37 (2.32-2.41) | 94.3     | 2.07 (2.00-2.13) | 95.0           | 1.90 (1.77-2.03) | [R]      | [R]              |
| <b>Sex</b>                                   |          |                  |          |                  |          |                  |                |                  |          |                  |
| Female (ref)                                 | 93.9     | 1.00             | 94.0     | 1.00             | 92.1     | 1.00             | 85.4           | 1.00             | 89.2     | 1.00             |
| Male                                         | 94.3     | 1.09 (1.08-1.09) | 94.6     | 1.12 (1.11-1.13) | 92.5     | 1.13 (1.11-1.15) | 87.6           | 1.04 (0.99-1.09) | 89.0     | 0.98 (0.94-1.02) |
| <b>Ethnicity</b>                             |          |                  |          |                  |          |                  |                |                  |          |                  |
| White (ref)                                  | 95.2     | 1.00             | 95.3     | 1.00             | 94.1     | 1.00             | 89.5           | 1.00             | 91.6     | 1.00             |
| Black                                        | 66.0     | 0.47 (0.46-0.48) | 68.6     | 0.48 (0.46-0.50) | 66.0     | 0.49 (0.45-0.52) | 70.2           | 0.62 (0.55-0.69) | 69.9     | 0.53 (0.48-0.60) |
| South Asian                                  | 79.6     | 0.63 (0.62-0.64) | 78.7     | 0.64 (0.63-0.66) | 75.3     | 0.64 (0.61-0.67) | 81.6           | 0.86 (0.79-0.92) | 80.2     | 0.72 (0.67-0.77) |
| Mixed                                        | 77.3     | 0.62 (0.59-0.64) | 79.2     | 0.63 (0.58-0.68) | 69.7     | 0.53 (0.46-0.60) | 81.8           | 0.83 (0.67-1.02) | 79.2     | 0.70 (0.57-0.86) |
| Other                                        | 82.3     | 0.67 (0.65-0.70) | 83.6     | 0.73 (0.69-0.77) | 79.3     | 0.71 (0.63-0.79) | 70.1           | 0.75 (0.61-0.91) | 80.3     | 0.71 (0.61-0.82) |
| <b>IMD</b>                                   |          |                  |          |                  |          |                  |                |                  |          |                  |
| 1 most deprived (ref)                        | 88.3     | 1.00             | 89.1     | 1.00             | 86.0     | 1.00             | 79.6           | 1.00             | 81.2     | 1.00             |
| 2                                            | 92.6     | 1.15 (1.14-1.16) | 93.1     | 1.13 (1.11-1.14) | 90.8     | 1.16 (1.12-1.19) | 85.3           | 1.19 (1.11-1.28) | 86.7     | 1.23 (1.16-1.31) |
| 3                                            | 94.9     | 1.25 (1.24-1.26) | 95.2     | 1.24 (1.22-1.26) | 93.4     | 1.26 (1.22-1.30) | 89.1           | 1.30 (1.21-1.40) | 90.9     | 1.39 (1.31-1.48) |
| 4                                            | 95.9     | 1.32 (1.31-1.33) | 96.0     | 1.30 (1.28-1.32) | 95.0     | 1.34 (1.30-1.38) | 92.3           | 1.39 (1.29-1.50) | 92.7     | 1.54 (1.44-1.64) |
| 5 least deprived                             | 96.8     | 1.44 (1.43-1.45) | 96.8     | 1.40 (1.38-1.42) | 96.0     | 1.44 (1.39-1.48) | 93.1           | 1.43 (1.31-1.55) | 94.6     | 1.64 (1.53-1.75) |
| <b>Setting</b>                               |          |                  |          |                  |          |                  |                |                  |          |                  |
| Urban city or town (ref)                     | 94.4     | 1.00             | 94.6     | 1.00             | 93.0     | 1.00             | 86.5           | 1.00             | 89.9     | 1.00             |
| Urban conurbation                            | 90.2     | 1.01 (1.01-1.02) | 90.5     | 1.01 (1.00-1.02) | 87.1     | 1.01 (0.98-1.03) | 83.1           | 1.22 (1.14-1.31) | 84.0     | 1.04 (0.98-1.10) |
| Rural town or village                        | 96.4     | 1.00 (1.00-1.01) | 96.5     | 1.00 (0.99-1.01) | 95.6     | 1.03 (1.00-1.05) | 94.1           | 1.17 (1.09-1.25) | 93.5     | 1.03 (0.98-1.08) |
| <b>Primary care coding of kidney disease</b> |          |                  |          |                  |          |                  |                |                  |          |                  |
| CKD diagnostic code                          | 94.9     | 1.05 (1.04-1.06) | 94.7     | 1.09 (1.07-1.10) | 92.8     | 1.17 (1.13-1.20) | 88.1           | 1.14 (1.07-1.22) | 90.1     | 1.11 (1.06-1.16) |
| <b>Risk group (occupation/access)</b>        |          |                  |          |                  |          |                  |                |                  |          |                  |
| Care home resident                           | 95.9     | 1.04 (1.02-1.06) | 96.1     | 1.09 (1.07-1.12) | 94.9     | 1.15 (1.10-1.20) | [R]            | [R]              | [R]      | [R]              |
| Health/social care worker                    | 93.7     | 2.32 (2.25-2.40) | 91.9     | 2.05 (1.88-2.22) | 90.2     | 2.09 (1.80-2.41) | [R]            | [R]              | [R]      | [R]              |
| Housebound                                   | 93.6     | 0.60 (0.59-0.61) | 93.7     | 0.63 (0.62-0.65) | 92.0     | 0.65 (0.63-0.68) | 90.5           | 0.92 (0.83-1.02) | 91.2     | 0.92 (0.84-1.00) |
| End of life care                             | 93.7     | 0.86 (0.85-0.88) | 93.9     | 0.89 (0.87-0.91) | 92.6     | 0.89 (0.85-0.93) | 86.5           | 0.84 (0.76-0.94) | [R]      | [R]              |
| <b>Risk group (clinical)</b>                 |          |                  |          |                  |          |                  |                |                  |          |                  |
| Prior SARS-CoV-2                             | 92.3     | 0.93 (0.91-0.94) | 92.7     | 0.94 (0.91-0.96) | 89.8     | 0.92 (0.88-0.97) | 83.2           | 0.94 (0.87-1.02) | 83.4     | 0.92 (0.83-1.01) |
| Immunosuppression                            | 95.4     | 1.15 (1.13-1.16) | 95.5     | 1.14 (1.11-1.17) | 93.6     | 1.18 (1.12-1.24) | 86.9           | 1.10 (1.00-1.21) | 89.4     | 1.05 (1.00-1.09) |
| Moderate/severe obesity                      | 92.8     | 0.97 (0.97-0.98) | 93.2     | 0.97 (0.96-0.99) | 91.4     | 0.97 (0.94-1.00) | 88.2           | 1.09 (1.02-1.17) | 88.7     | 1.06 (0.99-1.13) |
| Diabetes                                     | 93.3     | 0.96 (0.95-0.96) | 93.4     | 0.97 (0.96-0.98) | 91.7     | 0.99 (0.97-1.01) | 88.1           | 1.02 (0.97-1.07) | 90.1     | 1.07 (1.03-1.12) |
| CRD (inc. asthma)                            | 94.6     | 1.00 (0.99-1.00) | 94.8     | 1.01 (1.00-1.02) | 93.2     | 1.01 (0.98-1.04) | 92.0           | 1.09 (1.01-1.18) | 89.3     | 0.93 (0.87-1.00) |
| Chronic heart disease                        | 95.1     | 0.98 (0.98-0.99) | 94.9     | 0.98 (0.97-0.99) | 93.5     | 1.00 (0.98-1.02) | 88.3           | 0.99 (0.94-1.04) | 90.6     | 1.01 (0.97-1.05) |
| Chronic liver disease                        | 92.7     | 1.01 (1.00-1.03) | 92.8     | 1.01 (0.99-1.04) | 91.3     | 1.02 (0.97-1.07) | 83.3           | 1.00 (0.91-1.11) | 89.9     | 1.06 (0.97-1.16) |
| Asplenia                                     | 95.1     | 1.10 (1.07-1.13) | 94.4     | 1.10 (1.05-1.15) | 90.2     | 0.97 (0.88-1.07) | 84.4           | 1.10 (0.90-1.34) | 87.3     | 0.95 (0.81-1.12) |
| Cancer (non-haematologic)                    | 95.9     | 1.07 (1.07-1.08) | 96.0     | 1.07 (1.05-1.08) | 94.8     | 1.09 (1.06-1.11) | 92.3           | 1.12 (1.05-1.20) | 93.7     | 1.14 (1.06-1.22) |
| Haematologic cancer                          | 95.9     | 1.01 (0.99-1.04) | 95.8     | 1.03 (0.99-1.07) | 94.1     | 0.97 (0.90-1.04) | [R]            | [R]              | 90.3     | 1.09 (0.94-1.25) |
| Organ transplant (non-kidney)                | 93.4     | 1.40 (1.32-1.49) | 94.4     | 1.39 (1.28-1.51) | [R]      | [R]              | [R]            | [R]              | [N]      | [N]              |
| CND (inc. learning disability)               | 94.3     | 0.90 (0.89-0.91) | 94.3     | 0.91 (0.90-0.92) | 92.6     | 0.93 (0.91-0.95) | 87.5           | 0.92 (0.86-0.99) | 90.9     | 0.97 (0.90-1.03) |
| Severe mental illness                        | 86.2     | 0.75 (0.74-0.77) | 90.6     | 0.84 (0.81-0.87) | 87.7     | 0.92 (0.85-0.98) | 73.3           | 0.80 (0.67-0.96) | 76.6     | 0.77 (0.63-0.94) |



| CEV (other) | 93.1 | 1.08 (1.05-1.11) | 93.6 | 1.09 (1.05-1.15) | 89.4 | 1.13 (1.05-1.21) | [N] | [N] | [N] | [N] |
|-------------|------|------------------|------|------------------|------|------------------|-----|-----|-----|-----|
|-------------|------|------------------|------|------------------|------|------------------|-----|-----|-----|-----|

Counts are rounded to the nearest 5. Cumulative coverage was determined based on Kaplan-Meier estimates, censoring at death, deregistration, or 31<sup>st</sup> August 2022. Hazard ratios and 95% confidence intervals were derived from partially adjusted models that included age, care home residence, health and social care worker status, housebound status, receipt of end-of-life care, setting (urban/rural), sex, ethnicity, IMD quintile, prior SARS-CoV-2 infection, immunosuppression, and haematologic cancer. Data are redacted [R] for any rows in which there were >0 and ≤10 event or non-event counts after rounding to the nearest 5, with non-event counts calculated among uncensored individuals. CEV, clinically extremely vulnerable; CKD, chronic kidney disease; CND, chronic neurological disease; IMD, index of multiple deprivation; [N], covariate absent in all individuals by definition; [R] redacted; RRT, renal replacement therapy; Tx, transplant.

Supplementary Table 4. Cumulative 3-dose coverage in subgroups defined by deprivation index, ethnicity, age, and kidney disease severity.

| Characteristic                 | IMD 1 (most deprived) |      |                        |      | IMD 2  |      |                        |      | IMD 3  |      |                        |      | IMD 4  |      |                        |      | IMD 5 (least deprived) |      |                        |      |
|--------------------------------|-----------------------|------|------------------------|------|--------|------|------------------------|------|--------|------|------------------------|------|--------|------|------------------------|------|------------------------|------|------------------------|------|
|                                | White                 |      | Minority ethnic groups |      | White  |      | Minority ethnic groups |      | White  |      | Minority ethnic groups |      | White  |      | Minority ethnic groups |      | White                  |      | Minority ethnic groups |      |
|                                | N                     | %    | N                      | %    | N      | %    | N                      | %    | N      | %    | N                      | %    | N      | %    | N                      | %    | N                      | %    | N                      | %    |
| <b>All</b>                     | 143510                | 91.3 | 20905                  | 66.9 | 171190 | 94.1 | 16045                  | 75.8 | 213100 | 95.6 | 11485                  | 80.4 | 209385 | 96.2 | 7590                   | 84.1 | 193375                 | 97.0 | 5610                   | 87.7 |
| <b>Age</b>                     |                       |      |                        |      |        |      |                        |      |        |      |                        |      |        |      |                        |      |                        |      |                        |      |
| 16–64                          | 19850                 | 81.3 | 6655                   | 59.6 | 19170  | 86.4 | 4720                   | 67.5 | 19665  | 89.3 | 3075                   | 72.0 | 17945  | 90.9 | 1970                   | 76.4 | 15395                  | 93.4 | 1375                   | 81.5 |
| 65–69                          | 12720                 | 89.5 | 2560                   | 67.0 | 13520  | 92.9 | 1875                   | 75.1 | 15135  | 94.4 | 1275                   | 79.1 | 14210  | 95.2 | 830                    | 85.8 | 12005                  | 95.9 | 610                    | 86.6 |
| 70–74                          | 22120                 | 92.3 | 2425                   | 71.5 | 25420  | 94.9 | 2015                   | 79.4 | 31215  | 96.1 | 1535                   | 84.2 | 30175  | 96.5 | 1015                   | 87.0 | 26870                  | 97.1 | 790                    | 89.6 |
| 75–79                          | 25380                 | 93.6 | 2475                   | 73.3 | 31565  | 95.6 | 2175                   | 81.8 | 40160  | 96.8 | 1690                   | 84.3 | 39405  | 97.4 | 1140                   | 86.6 | 36295                  | 97.9 | 920                    | 90.3 |
| 80+                            | 63440                 | 94.1 | 6790                   | 70.2 | 81520  | 95.4 | 5260                   | 79.8 | 106935 | 96.4 | 3915                   | 83.9 | 107650 | 96.8 | 2635                   | 86.7 | 102815                 | 97.4 | 1920                   | 89.4 |
| <b>Kidney disease subgroup</b> |                       |      |                        |      |        |      |                        |      |        |      |                        |      |        |      |                        |      |                        |      |                        |      |
| CKD3a                          | 92270                 | 91.4 | 12630                  | 66.3 | 112400 | 94.2 | 9790                   | 75.2 | 142175 | 95.7 | 7210                   | 79.8 | 141890 | 96.3 | 4890                   | 83.4 | 132825                 | 97.1 | 3710                   | 87.4 |
| CKD3b                          | 37355                 | 92.0 | 4675                   | 67.0 | 43600  | 94.4 | 3620                   | 77.6 | 53440  | 95.9 | 2530                   | 81.7 | 51140  | 96.4 | 1655                   | 85.1 | 46200                  | 97.0 | 1170                   | 88.1 |
| CKD4-5                         | 10320                 | 90.3 | 1945                   | 64.0 | 11610  | 93.1 | 1380                   | 72.8 | 13620  | 94.6 | 980                    | 78.9 | 12815  | 95.5 | 545                    | 82.5 | 11245                  | 96.3 | 400                    | 85.7 |
| RRT (dial.)                    | 1770                  | 83.1 | 850                    | 73.2 | 1580   | 88.6 | 605                    | 75.8 | 1540   | 90.8 | 350                    | 81.7 | 1330   | 92.3 | 205                    | 85.7 | 1085                   | 93.6 | 140                    | 83.8 |
| RRT (Tx)                       | 1800                  | 85.2 | 805                    | 72.3 | 2000   | 89.2 | 650                    | 78.7 | 2330   | 92.4 | 415                    | 81.7 | 2215   | 93.9 | 305                    | 82.1 | 2015                   | 95.1 | 200                    | 85.9 |

Cumulative coverage (%) was determined based on Kaplan-Meier estimates, censoring at death, deregistration, or 31<sup>st</sup> August 2022. Minority ethnic groups are combined due to their low combined prevalence within the study population. CKD, chronic kidney disease; dial., dialysis; IMD, index of multiple deprivation quintile; RRT, renal replacement therapy; Tx, transplant.

## Key

|  |        |
|--|--------|
|  | <75%   |
|  | 75–90% |

Supplementary Table 5. Baseline characteristics of secondary outcome analysis population (dose 4 uptake).

| Characteristic                                | All, n (%)     | CKD3a, n (%)   | CKD3b, n (%)   | CKD4-5, n (%) | RRT (dialysis), n (%) | RRT (Tx), n (%) |
|-----------------------------------------------|----------------|----------------|----------------|---------------|-----------------------|-----------------|
| <b>N</b>                                      | 698,755 (100)  | 431,830 (100)  | 199,175 (100)  | 51,305 (100)  | 3,715 (100)           | 12,735 (100)    |
| <b>Age</b>                                    |                |                |                |               |                       |                 |
| 16-64                                         | 17,035 (2.4)   | 5,170 (1.2)    | 1,405 (0.7)    | 565 (1.1)     | 615 (16.6)            | 9,285 (72.9)    |
| 65-69                                         | 6,630 (0.9)    | 3,660 (0.8)    | 1,075 (0.5)    | 335 (0.7)     | 145 (3.9)             | 1,415 (11.1)    |
| 70-74                                         | 11,015 (1.6)   | 6,850 (1.6)    | 2,200 (1.1)    | 650 (1.3)     | 145 (3.9)             | 1,170 (9.2)     |
| 75-79                                         | 181,200 (25.9) | 130,805 (30.3) | 39,940 (20.1)  | 8,620 (16.8)  | 1,225 (33.0)          | 615 (4.8)       |
| 80+                                           | 482,870 (69.1) | 285,345 (66.1) | 154,560 (77.6) | 41,135 (80.2) | 1,590 (42.8)          | 245 (1.9)       |
| <b>Sex</b>                                    |                |                |                |               |                       |                 |
| Female                                        | 398,820 (57.1) | 248,700 (57.6) | 116,330 (58.4) | 27,545 (53.7) | 1,335 (35.9)          | 4,910 (38.6)    |
| Male                                          | 299,940 (42.9) | 183,130 (42.4) | 82,845 (41.6)  | 23,755 (46.3) | 2,385 (64.2)          | 7,825 (61.4)    |
| <b>Ethnicity</b>                              |                |                |                |               |                       |                 |
| White                                         | 665,365 (95.2) | 413,335 (95.7) | 190,370 (95.6) | 48,230 (94.0) | 3,080 (82.9)          | 10,355 (81.3)   |
| Black                                         | 8,610 (1.2)    | 4,910 (1.1)    | 2,240 (1.1)    | 790 (1.5)     | 185 (5.0)             | 490 (3.8)       |
| South Asian                                   | 18,360 (2.6)   | 9,860 (2.3)    | 4,880 (2.5)    | 1,770 (3.4)   | 360 (9.7)             | 1,490 (11.7)    |
| Mixed                                         | 2,455 (0.4)    | 1,455 (0.3)    | 645 (0.3)      | 195 (0.4)     | 35 (0.9)              | 125 (1.0)       |
| Other                                         | 3,965 (0.6)    | 2,270 (0.5)    | 1,045 (0.5)    | 320 (0.6)     | 55 (1.5)              | 275 (2.2)       |
| <b>Index of multiple deprivation quintile</b> |                |                |                |               |                       |                 |
| 1 most deprived                               | 105,175 (15.1) | 61,455 (14.2)  | 31,565 (15.8)  | 8,785 (17.1)  | 765 (20.6)            | 2,605 (20.5)    |
| 2                                             | 127,700 (18.3) | 76,800 (17.8)  | 37,380 (18.8)  | 10,065 (19.6) | 805 (21.7)            | 2,650 (20.8)    |
| 3                                             | 160,310 (22.9) | 99,115 (23.0)  | 45,905 (23.0)  | 11,735 (22.9) | 805 (21.7)            | 2,750 (21.6)    |
| 4                                             | 157,740 (22.6) | 99,470 (23.0)  | 44,055 (22.1)  | 10,980 (21.4) | 720 (19.4)            | 2,515 (19.7)    |
| 5 least deprived                              | 147,835 (21.2) | 94,985 (22.0)  | 40,275 (20.2)  | 9,740 (19.0)  | 620 (16.7)            | 2,210 (17.4)    |
| <b>Setting</b>                                |                |                |                |               |                       |                 |
| Urban city or town                            | 373,270 (53.4) | 229,995 (53.3) | 107,200 (53.8) | 27,600 (53.8) | 1,875 (50.5)          | 6,605 (51.9)    |
| Urban conurbation                             | 140,300 (20.1) | 85,065 (19.7)  | 39,865 (20.0)  | 10,885 (21.2) | 1,010 (27.2)          | 3,470 (27.2)    |
| Rural                                         | 185,185 (26.5) | 116,770 (27.0) | 52,110 (26.2)  | 12,820 (25.0) | 830 (22.3)            | 2,655 (20.8)    |
| <b>Primary care coding of kidney disease</b>  |                |                |                |               |                       |                 |
| CKD3-5 diagnostic code                        | 439,595 (62.9) | 223,695 (51.8) | 157,215 (78.9) | 45,745 (89.2) | 3,290 (88.6)          | 9,650 (75.8)    |
| Dialysis code                                 | 11,280 (1.6)   | [N]            | [N]            | [N]           | 2,980 (80.2)          | 8,300 (65.2)    |
| Kidney transplant code                        | 12,780 (1.8)   | [N]            | [N]            | [N]           | 440 (11.8)            | 12,340 (96.9)   |
| <b>Risk group (occupation/access)</b>         |                |                |                |               |                       |                 |
| Care home resident                            | 44,470 (6.4)   | 24,280 (5.6)   | 15,255 (7.7)   | 4,705 (9.2)   | 165 (4.4)             | 65 (0.5)        |
| Health/ social care worker                    | 1,040 (0.1)    | 515 (0.1)      | 110 (0.1)      | 30 (0.1)      | [R]                   | 370 (2.9)       |
| Housebound                                    | 50,195 (7.2)   | 24,770 (5.7)   | 18,040 (9.1)   | 6,445 (12.6)  | 330 (8.9)             | 610 (4.8)       |
| End of life care                              | 36,515 (5.2)   | 18,305 (4.2)   | 12,585 (6.3)   | 5,110 (10.0)  | 335 (9.0)             | 180 (1.4)       |
| <b>Risk group (clinical)</b>                  |                |                |                |               |                       |                 |
| Prior SARS-CoV-2 *                            | 20,685 (3.0)   | 10,845 (2.5)   | 6,590 (3.3)    | 2,295 (4.5)   | 415 (11.2)            | 535 (4.2)       |
| Immunosuppression                             | 56,985 (8.2)   | 33,045 (7.7)   | 13,600 (6.8)   | 4,000 (7.8)   | 985 (26.5)            | 5,355 (42.0)    |
| Moderate/ severe obesity                      | 53,820 (7.7)   | 31,075 (7.2)   | 16,655 (8.4)   | 4,680 (9.1)   | 260 (7.0)             | 1,150 (9.0)     |
| Diabetes                                      | 190,955 (27.3) | 100,935 (23.4) | 63,425 (31.8)  | 21,350 (41.6) | 1,405 (37.8)          | 3,840 (30.2)    |
| Chronic respiratory disease (inc. asthma)     | 92,340 (13.2)  | 55,060 (12.8)  | 28,215 (14.2)  | 7,570 (14.8)  | 505 (13.6)            | 990 (7.8)       |

|                                           |                |                |                |               |              |              |
|-------------------------------------------|----------------|----------------|----------------|---------------|--------------|--------------|
| Chronic heart disease                     | 347,840 (49.8) | 200,060 (46.3) | 110,430 (55.4) | 31,365 (61.1) | 2,140 (57.6) | 3,850 (30.2) |
| Chronic liver disease                     | 18,560 (2.7)   | 11,035 (2.6)   | 5,265 (2.6)    | 1,480 (2.9)   | 200 (5.4)    | 585 (4.6)    |
| Asplenia                                  | 5,960 (0.9)    | 3,690 (0.9)    | 1,585 (0.8)    | 455 (0.9)     | 55 (1.5)     | 170 (1.3)    |
| Cancer (non-haematologic)                 | 130,945 (18.7) | 79,045 (18.3)  | 39,060 (19.6)  | 11,145 (21.7) | 730 (19.7)   | 960 (7.5)    |
| Haematologic cancer                       | 20,430 (2.9)   | 12,180 (2.8)   | 5,830 (2.9)    | 1,875 (3.7)   | 310 (8.3)    | 240 (1.9)    |
| Organ transplant (non-kidney) †           | 2,190 (0.3)    | 1,205 (0.3)    | 690 (0.3)      | 220 (0.4)     | 75 (2.0)     | [N]          |
| CND (inc. learning disability)            | 135,005 (19.3) | 79,505 (18.4)  | 42,145 (21.2)  | 11,520 (22.5) | 655 (17.6)   | 1,180 (9.3)  |
| Severe mental illness                     | 7,075 (1.0)    | 4,185 (1.0)    | 2,070 (1.0)    | 640 (1.2)     | 55 (1.5)     | 125 (1.0)    |
| Clinically extremely vulnerable (other) § | 5,850 (0.8)    | 3,585 (0.8)    | 1,690 (0.8)    | 580 (1.1)     | [N]          | [N]          |
| <b>Region</b>                             |                |                |                |               |              |              |
| East of England                           | 156,055 (22.3) | 97,360 (22.5)  | 43,865 (22.0)  | 10,950 (21.3) | 910 (24.5)   | 2,970 (23.3) |
| Midlands                                  | 155,545 (22.3) | 95,935 (22.2)  | 44,660 (22.4)  | 11,410 (22.2) | 825 (22.2)   | 2,715 (21.3) |
| London                                    | 20,295 (2.9)   | 11,830 (2.7)   | 5,525 (2.8)    | 1,775 (3.5)   | 255 (6.9)    | 905 (7.1)    |
| North East and Yorkshire                  | 131,475 (18.8) | 80,280 (18.6)  | 38,150 (19.2)  | 9,910 (19.3)  | 675 (18.2)   | 2,465 (19.4) |
| North West                                | 63,585 (9.1)   | 39,165 (9.1)   | 18,285 (9.2)   | 4,735 (9.2)   | 235 (6.3)    | 1,160 (9.1)  |
| South East                                | 43,760 (6.3)   | 27,525 (6.4)   | 12,125 (6.1)   | 3,135 (6.1)   | 235 (6.3)    | 735 (5.8)    |
| South West                                | 128,045 (18.3) | 79,730 (18.5)  | 36,560 (18.4)  | 9,385 (18.3)  | 585 (15.7)   | 1,780 (14.0) |

Individuals were included in the analysis if they were  $\geq 75$  years of age at baseline, care home residents, transplant recipients, or had a history of haematologic malignancy or immunosuppression. Data are n (%) after rounding to the nearest 5. Primary care codes and risk groups are coded by separate binary variables; percentages under these table subheadings therefore do not sum to 100. Among people with CKD4–5, 47,670 had stage 4 CKD (eGFR 15–29 ml/min/1.73 m<sup>2</sup>) and 3,630 had stage 5 CKD (eGFR <15ml/min/1.73 m<sup>2</sup>). CKD, chronic kidney disease; CND, chronic neurological disease; [N], covariate absent in all individuals by definition; RRT, renal replacement therapy; Tx, transplant. \* Based on prior evidence of a positive SARS-CoV-2 test, COVID-19-related primary care code, or COVID-19-related hospitalisation as of 1<sup>st</sup> December 2020; † Excludes individuals with kidney transplants based on primary care coding or UK Renal Registry status; § Classified as clinically extremely vulnerable in the absence of any of the comorbidities listed above (including RRT).

**Supplementary Table 6. Cox proportional hazards models for factors associated with completion of a 4-dose vaccination series in people with kidney disease.**

| Variable                                     | N (n events)      | Cov. (%) | HR (95% CI), minimally adjusted | HR (95% CI), partially adjusted | HR (95% CI), fully adjusted |
|----------------------------------------------|-------------------|----------|---------------------------------|---------------------------------|-----------------------------|
| <b>Age</b>                                   |                   |          |                                 |                                 |                             |
| 16–64 (ref)                                  | 17,035 (8,955)    | 56.1     | 1.00                            | 1.00                            | 1.00                        |
| 65–69                                        | 6,630 (3,685)     | 62.3     | 1.18 (1.14-1.23)                | 1.06 (1.02-1.10)                | 1.53 (1.47-1.60)            |
| 70–74                                        | 11,015 (6,750)    | 70.5     | 1.41 (1.37-1.45)                | 1.20 (1.16-1.24)                | 1.89 (1.82-1.96)            |
| 75–79                                        | 181,200 (139,245) | 83.9     | 1.71 (1.67-1.74)                | 1.68 (1.64-1.72)                | 2.96 (2.87-3.06)            |
| 80+                                          | 482,870 (321,255) | 82.7     | 1.70 (1.67-1.74)                | 1.71 (1.67-1.75)                | 3.04 (2.94-3.13)            |
| <b>Sex</b>                                   |                   |          |                                 |                                 |                             |
| Female (ref)                                 | 398,820 (272,245) | 80.7     | 1.00                            | 1.00                            | 1.00                        |
| Male                                         | 299,940 (207,645) | 83.5     | 1.15 (1.15-1.16)                | 1.14 (1.13-1.15)                | 1.14 (1.13-1.15)            |
| <b>Ethnicity</b>                             |                   |          |                                 |                                 |                             |
| White (ref)                                  | 665,365 (465,840) | 83.5     | 1.00                            | 1.00                            | 1.00                        |
| Black                                        | 8,610 (3,115)     | 42.0     | 0.34 (0.33-0.35)                | 0.37 (0.36-0.39)                | 0.38 (0.37-0.40)            |
| South Asian                                  | 18,360 (7,610)    | 49.2     | 0.42 (0.41-0.43)                | 0.46 (0.45-0.47)                | 0.46 (0.45-0.47)            |
| Mixed                                        | 2,455 (1,185)     | 56.4     | 0.51 (0.48-0.54)                | 0.53 (0.50-0.56)                | 0.54 (0.51-0.57)            |
| Other                                        | 3,965 (2,140)     | 64.7     | 0.66 (0.64-0.69)                | 0.69 (0.66-0.72)                | 0.68 (0.65-0.71)            |
| <b>IMD</b>                                   |                   |          |                                 |                                 |                             |
| 1 most deprived (ref)                        | 105,175 (60,455)  | 70.5     | 1.00                            | 1.00                            | 1.00                        |
| 2                                            | 127,700 (83,030)  | 78.5     | 1.24 (1.23-1.26)                | 1.19 (1.18-1.21)                | 1.19 (1.18-1.20)            |
| 3                                            | 160,310 (112,170) | 83.3     | 1.41 (1.40-1.43)                | 1.32 (1.31-1.33)                | 1.31 (1.30-1.33)            |
| 4                                            | 157,740 (113,965) | 85.3     | 1.51 (1.50-1.53)                | 1.41 (1.39-1.42)                | 1.39 (1.38-1.41)            |
| 5 least deprived                             | 147,835 (110,270) | 87.4     | 1.64 (1.62-1.65)                | 1.52 (1.50-1.53)                | 1.50 (1.48-1.51)            |
| <b>Setting</b>                               |                   |          |                                 |                                 |                             |
| Urban city or town (ref)                     | 373,270 (258,070) | 82.5     | 1.00                            | 1.00                            | 1.00                        |
| Urban conurbation                            | 140,300 (86,560)  | 74.6     | 0.90 (0.89-0.91)                | 0.99 (0.98-1.00)                | 0.98 (0.97-0.99)            |
| Rural town or village                        | 185,185 (135,255) | 86.2     | 1.10 (1.09-1.10)                | 1.02 (1.01-1.03)                | 1.02 (1.01-1.02)            |
| <b>Kidney disease subgroup</b>               |                   |          |                                 |                                 |                             |
| CKD3a (ref)                                  | 431,830 (312,330) | 82.9     | 1.00                            | 1.00                            | 1.00                        |
| CKD3b                                        | 199,175 (130,145) | 81.4     | 0.92 (0.92-0.93)                | 0.94 (0.93-0.94)                | 0.93 (0.92-0.94)            |
| CKD4–5                                       | 51,305 (27,610)   | 78.7     | 0.85 (0.84-0.86)                | 0.88 (0.87-0.89)                | 0.87 (0.86-0.88)            |
| RRT (dialysis)                               | 3,715 (1,830)     | 71.1     | 0.98 (0.93-1.03)                | 1.07 (1.02-1.12)                | 1.05 (1.00-1.10)            |
| RRT (Tx)                                     | 12,735 (7,970)    | 67.3     | 2.05 (1.99-2.12)                | 2.37 (2.30-2.45)                | 2.44 (2.36-2.52)            |
| <b>Primary care coding of kidney disease</b> |                   |          |                                 |                                 |                             |
| CKD diagnostic code                          | 439,595 (301,095) | 82.2     | 1.02 (1.01-1.02)                | 1.03 (1.02-1.03)                | 1.05 (1.04-1.06)            |
| <b>Risk group (occupation/access)</b>        |                   |          |                                 |                                 |                             |
| Care home resident                           | 44,470 (19,620)   | 82.7     | 0.86 (0.85-0.87)                | 0.92 (0.90-0.93)                | 0.98 (0.96-0.99)            |
| Health/social care worker                    | 1,040 (745)       | 73.5     | 1.40 (1.30-1.51)                | 1.45 (1.35-1.56)                | 1.40 (1.30-1.51)            |
| Housebound                                   | 50,195 (25,025)   | 77.2     | 0.72 (0.72-0.73)                | 0.75 (0.74-0.76)                | 0.77 (0.76-0.78)            |
| End of life care                             | 36,515 (15,080)   | 79.1     | 0.89 (0.87-0.90)                | 0.92 (0.90-0.93)                | 0.92 (0.90-0.94)            |
| <b>Risk group (clinical)</b>                 |                   |          |                                 |                                 |                             |
| Prior SARS-CoV-2                             | 20,685 (9,985)    | 75.8     | 0.86 (0.84-0.88)                | 0.91 (0.89-0.93)                | 0.92 (0.90-0.94)            |
| Immunosuppression                            | 56,985 (35,705)   | 74.3     | 1.20 (1.19-1.22)                | 1.16 (1.14-1.18)                | 1.19 (1.18-1.21)            |
| Moderate/severe obesity                      | 53,820 (36,900)   | 78.9     | 0.89 (0.88-0.89)                | 0.93 (0.92-0.94)                | 0.94 (0.93-0.96)            |
| Diabetes                                     | 190,955 (122,995) | 79.1     | 0.88 (0.88-0.89)                | 0.94 (0.93-0.94)                | 0.95 (0.94-0.95)            |
| CRD (inc. asthma)                            | 92,340 (58,055)   | 80.8     | 0.97 (0.96-0.97)                | 0.98 (0.97-0.99)                | 0.98 (0.97-0.99)            |
| Chronic heart disease                        | 347,840 (229,640) | 82.4     | 0.99 (0.98-0.99)                | 0.97 (0.97-0.98)                | 0.98 (0.98-0.99)            |
| Chronic liver disease                        | 18,560 (12,195)   | 78.9     | 1.00 (0.99-1.02)                | 1.02 (1.00-1.04)                | 1.02 (1.00-1.04)            |
| Asplenia                                     | 5,960 (4,170)     | 83.2     | 1.10 (1.07-1.14)                | 1.08 (1.05-1.12)                | 1.08 (1.04-1.11)            |
| Cancer (non-haematologic)                    | 130,945 (88,215)  | 84.6     | 1.09 (1.09-1.10)                | 1.06 (1.05-1.07)                | 1.07 (1.06-1.07)            |
| Haematologic cancer                          | 20,430 (12,960)   | 79.2     | 1.29 (1.27-1.31)                | 1.13 (1.11-1.16)                | 1.17 (1.14-1.19)            |
| Organ transplant (non-kidney)                | 2,190 (1,430)     | 73.2     | 1.51 (1.43-1.59)                | 1.56 (1.48-1.64)                | 1.99 (1.88-2.10)            |
| CND (inc. learning disability)               | 135,005 (80,650)  | 80.4     | 0.89 (0.89-0.90)                | 0.90 (0.89-0.91)                | 0.90 (0.90-0.91)            |
| Severe mental illness                        | 7,075 (3,795)     | 69.3     | 0.70 (0.68-0.72)                | 0.75 (0.72-0.77)                | 0.77 (0.74-0.79)            |
| CEV (other)                                  | 5,850 (4,005)     | 80.9     | 1.02 (0.99-1.05)                | 1.07 (1.04-1.10)                | 1.03 (1.00-1.07)            |

Cumulative coverage was determined based on Kaplan-Meier estimates, censoring at death, deregistration, or 31<sup>st</sup> August 2022. Minimally adjusted models included age, care home residence, and health and social care worker status given their use in vaccine prioritisation criteria. Partially adjusted models additionally included housebound status, receipt of end-of-life care, setting, sex, ethnicity, IMD quintile, prior SARS-CoV-2 infection, immunosuppression, and haematologic cancer. Fully adjusted models included all covariates. CI, confidence interval; CKD, chronic kidney disease; HR, hazard ratio; IMD, index of multiple deprivation; OR, odds ratio; RRT, renal replacement therapy; Tx, transplant.

Supplementary Table 7. Cox proportional hazards models for factors associated with completion of a 4-dose vaccination series in kidney disease subgroups.

| Variable                                     | CKD3a    |                  | CKD3b    |                  | CKD4-5   |                  | RRT (dialysis) |                  | RRT (Tx) |                  |
|----------------------------------------------|----------|------------------|----------|------------------|----------|------------------|----------------|------------------|----------|------------------|
|                                              | Cov. (%) | HR (95% CI)      | Cov. (%) | HR (95% CI)      | Cov. (%) | HR (95% CI)      | Cov. (%)       | HR (95% CI)      | Cov. (%) | HR (95% CI)      |
| <b>Age</b>                                   |          |                  |          |                  |          |                  |                |                  |          |                  |
| 16-64 (ref)                                  | 47.4     | 1.00             | 51.1     | 1.00             | 54.7     | 1.00             | 51.8           | 1.00             | 61.9     | 1.00             |
| 65-69                                        | 55.6     | 1.19 (1.12-1.27) | 61.0     | 1.23 (1.10-1.38) | 62.1     | 1.26 (1.03-1.53) | 61.6           | 1.27 (0.97-1.67) | 80.4     | 1.63 (1.53-1.75) |
| 70-74                                        | 68.4     | 1.62 (1.54-1.70) | 70.0     | 1.44 (1.31-1.59) | 68.1     | 1.31 (1.11-1.55) | 71.8           | 1.49 (1.13-1.96) | 84.3     | 1.72 (1.60-1.85) |
| 75-79                                        | 84.7     | 2.69 (2.58-2.82) | 82.1     | 2.10 (1.93-2.27) | 79.0     | 1.73 (1.52-1.97) | 75.3           | 1.64 (1.32-2.05) | 87.1     | 1.72 (1.56-1.90) |
| 80+                                          | 83.5     | 2.78 (2.66-2.90) | 81.8     | 2.16 (2.00-2.34) | 79.3     | 1.74 (1.53-1.99) | 76.6           | 1.77 (1.42-2.20) | 83.1     | 1.75 (1.49-2.06) |
| <b>Sex</b>                                   |          |                  |          |                  |          |                  |                |                  |          |                  |
| Female (ref)                                 | 81.7     | 1.00             | 79.9     | 1.00             | 76.6     | 1.00             | 66.6           | 1.00             | 69.0     | 1.00             |
| Male                                         | 84.7     | 1.13 (1.12-1.14) | 83.5     | 1.16 (1.15-1.18) | 81.2     | 1.19 (1.16-1.21) | 73.0           | 1.14 (1.03-1.26) | 66.1     | 0.92 (0.88-0.96) |
| <b>Ethnicity</b>                             |          |                  |          |                  |          |                  |                |                  |          |                  |
| White (ref)                                  | 84.4     | 1.00             | 82.9     | 1.00             | 80.8     | 1.00             | 75.5           | 1.00             | 72.9     | 1.00             |
| Black                                        | 41.8     | 0.36 (0.35-0.38) | 42.5     | 0.39 (0.36-0.41) | 42.3     | 0.41 (0.37-0.47) | 50.1           | 0.57 (0.44-0.72) | 35.1     | 0.39 (0.34-0.46) |
| South Asian                                  | 51.1     | 0.46 (0.44-0.47) | 48.3     | 0.45 (0.43-0.47) | 44.2     | 0.44 (0.40-0.48) | 49.1           | 0.54 (0.45-0.65) | 43.1     | 0.51 (0.47-0.56) |
| Mixed                                        | 58.8     | 0.56 (0.52-0.60) | 55.5     | 0.52 (0.47-0.59) | 45.3     | 0.47 (0.37-0.60) | [R]            | [R]              | 39.1     | 0.49 (0.36-0.65) |
| Other                                        | 65.2     | 0.66 (0.63-0.70) | 65.0     | 0.68 (0.63-0.74) | 63.9     | 0.79 (0.67-0.93) | [R]            | [R]              | 54.0     | 0.63 (0.53-0.75) |
| <b>IMD</b>                                   |          |                  |          |                  |          |                  |                |                  |          |                  |
| 1 most deprived (ref)                        | 71.9     | 1.00             | 71.1     | 1.00             | 66.7     | 1.00             | 54.9           | 1.00             | 48.7     | 1.00             |
| 2                                            | 79.7     | 1.20 (1.18-1.21) | 78.1     | 1.17 (1.15-1.20) | 75.5     | 1.19 (1.14-1.25) | 68.6           | 1.37 (1.18-1.60) | 61.1     | 1.35 (1.25-1.46) |
| 3                                            | 84.0     | 1.31 (1.30-1.33) | 83.1     | 1.30 (1.28-1.33) | 80.1     | 1.31 (1.25-1.36) | 76.1           | 1.47 (1.26-1.72) | 71.6     | 1.65 (1.53-1.78) |
| 4                                            | 86.1     | 1.40 (1.38-1.42) | 84.7     | 1.38 (1.35-1.40) | 83.2     | 1.42 (1.36-1.48) | 78.8           | 1.56 (1.33-1.83) | 76.6     | 1.82 (1.69-1.97) |
| 5 least deprived                             | 88.1     | 1.51 (1.49-1.53) | 86.6     | 1.48 (1.45-1.51) | 85.4     | 1.52 (1.46-1.58) | 77.4           | 1.53 (1.30-1.80) | 80.0     | 1.98 (1.84-2.15) |
| <b>Setting</b>                               |          |                  |          |                  |          |                  |                |                  |          |                  |
| Urban city or town (ref)                     | 83.4     | 1.00             | 82.1     | 1.00             | 79.3     | 1.00             | 70.7           | 1.00             | 68.2     | 1.00             |
| Urban conurbation                            | 76.1     | 0.99 (0.98-1.00) | 74.0     | 0.97 (0.95-0.98) | 70.9     | 1.01 (0.98-1.05) | 64.3           | 1.15 (1.00-1.32) | 56.9     | 1.05 (0.98-1.13) |
| Rural town or village                        | 86.9     | 1.02 (1.01-1.03) | 85.4     | 1.01 (1.00-1.02) | 83.8     | 1.04 (1.01-1.07) | 80.2           | 1.09 (0.97-1.23) | 78.6     | 1.13 (1.07-1.20) |
| <b>Primary care coding of kidney disease</b> |          |                  |          |                  |          |                  |                |                  |          |                  |
| CKD diagnostic code                          | 83.6     | 1.03 (1.03-1.04) | 82.0     | 1.08 (1.06-1.09) | 79.0     | 1.08 (1.04-1.13) | 72.4           | 1.10 (0.95-1.29) | 69.0     | 1.15 (1.09-1.21) |
| <b>Risk group (occupation/access)</b>        |          |                  |          |                  |          |                  |                |                  |          |                  |
| Care home resident                           | 82.4     | 0.91 (0.89-0.92) | 83.6     | 0.96 (0.94-0.99) | 81.8     | 1.05 (1.00-1.11) | 57.1           | 0.83 (0.62-1.12) | 50.0     | 0.58 (0.40-0.83) |
| Health/social care worker                    | 73.2     | 1.42 (1.28-1.57) | 76.1     | 1.37 (1.11-1.70) | [R]      | [R]              | [R]            | [R]              | 71.2     | 1.31 (1.15-1.48) |
| Housebound                                   | 77.8     | 0.74 (0.73-0.75) | 77.6     | 0.77 (0.75-0.78) | 74.2     | 0.78 (0.75-0.81) | 68.3           | 0.93 (0.77-1.12) | 72.6     | 0.96 (0.87-1.07) |
| End of life care                             | 80.2     | 0.91 (0.89-0.93) | 79.2     | 0.93 (0.90-0.96) | 74.8     | 0.91 (0.86-0.96) | 63.1           | 0.77 (0.64-0.94) | 73.4     | 1.23 (1.00-1.51) |
| <b>Risk group (clinical)</b>                 |          |                  |          |                  |          |                  |                |                  |          |                  |
| Prior SARS-CoV-2                             | 77.8     | 0.91 (0.89-0.94) | 77.0     | 0.92 (0.89-0.95) | 71.6     | 0.88 (0.82-0.95) | 56.4           | 0.77 (0.65-0.91) | 54.1     | 0.84 (0.74-0.95) |
| Immunosuppression                            | 74.1     | 1.19 (1.17-1.22) | 77.3     | 1.19 (1.15-1.23) | 74.6     | 1.27 (1.19-1.36) | 60.6           | 1.12 (0.91-1.37) | 70.6     | 1.18 (1.13-1.24) |
| Moderate/severe obesity                      | 79.8     | 0.93 (0.92-0.94) | 79.2     | 0.94 (0.93-0.96) | 75.8     | 0.94 (0.90-0.98) | 62.3           | 0.90 (0.74-1.09) | 64.5     | 1.00 (0.92-1.08) |
| Diabetes                                     | 79.9     | 0.93 (0.92-0.94) | 79.3     | 0.96 (0.95-0.97) | 76.8     | 0.97 (0.95-0.99) | 68.3           | 0.96 (0.87-1.06) | 67.5     | 1.05 (1.00-1.11) |
| CRD (inc. asthma)                            | 81.6     | 0.98 (0.97-0.99) | 80.3     | 0.98 (0.97-1.00) | 78.1     | 1.00 (0.97-1.04) | 72.3           | 1.04 (0.90-1.20) | 68.3     | 0.95 (0.87-1.03) |
| Chronic heart disease                        | 83.4     | 0.97 (0.97-0.98) | 81.7     | 0.98 (0.97-0.99) | 79.2     | 1.00 (0.97-1.02) | 73.4           | 1.02 (0.93-1.13) | 72.4     | 1.06 (1.01-1.11) |
| Chronic liver disease                        | 79.5     | 1.03 (1.01-1.05) | 79.2     | 1.03 (1.00-1.07) | 76.1     | 1.03 (0.96-1.11) | 66.6           | 1.19 (0.97-1.47) | 69.5     | 1.19 (1.07-1.32) |
| Asplenia                                     | 84.5     | 1.09 (1.05-1.14) | 83.4     | 1.10 (1.03-1.17) | 75.3     | 1.01 (0.89-1.14) | [R]            | [R]              | 63.8     | 0.93 (0.76-1.13) |
| Cancer (non-haematologic)                    | 85.3     | 1.07 (1.06-1.08) | 83.8     | 1.06 (1.05-1.08) | 82.0     | 1.08 (1.05-1.11) | 78.3           | 1.09 (0.97-1.22) | 78.7     | 1.16 (1.07-1.26) |
| Haematologic cancer                          | 79.0     | 1.17 (1.14-1.21) | 80.3     | 1.17 (1.12-1.22) | 77.3     | 1.13 (1.04-1.23) | 72.2           | 1.38 (1.13-1.69) | 73.4     | 1.00 (0.86-1.18) |
| Organ transplant (non-kidney)                | 72.5     | 2.08 (1.94-2.23) | 74.1     | 1.86 (1.68-2.05) | 69.0     | 1.52 (1.27-1.82) | 61.5           | 1.63 (1.18-2.24) | [N]      | [N]              |
| CND (inc. learning disability)               | 81.2     | 0.90 (0.89-0.91) | 79.9     | 0.90 (0.88-0.91) | 76.9     | 0.92 (0.89-0.95) | 67.5           | 0.90 (0.79-1.02) | 71.4     | 1.04 (0.97-1.12) |
| Severe mental illness                        | 68.4     | 0.74 (0.71-0.77) | 71.6     | 0.78 (0.74-0.83) | 71.4     | 0.87 (0.78-0.97) | 35.2           | 0.58 (0.37-0.92) | 54.3     | 0.87 (0.68-1.12) |

| CEV (other)                                                                                                                                                                                                                                                                                                                                                                                                                                                                                                                                                                                                                                                                                                                                                                                                                                                                                                                                                                                                                                                                                                                                                                                                  | 81.1 | 1.06 (1.02-1.11) | 80.5 | 1.11 (1.05-1.18) | 77.9 | 1.06 (0.95-1.18) | [N] | [N] | [N] | [N] |
|--------------------------------------------------------------------------------------------------------------------------------------------------------------------------------------------------------------------------------------------------------------------------------------------------------------------------------------------------------------------------------------------------------------------------------------------------------------------------------------------------------------------------------------------------------------------------------------------------------------------------------------------------------------------------------------------------------------------------------------------------------------------------------------------------------------------------------------------------------------------------------------------------------------------------------------------------------------------------------------------------------------------------------------------------------------------------------------------------------------------------------------------------------------------------------------------------------------|------|------------------|------|------------------|------|------------------|-----|-----|-----|-----|
| Individuals were included in the analysis if they were $\geq 75$ years of age at baseline, care home residents, transplant recipients, or had a history of haematologic malignancy or immunosuppression. Counts are rounded to the nearest 5. Cumulative coverage was determined based on Kaplan-Meier estimates, censoring at death, deregistration, or 31 <sup>st</sup> August 2022. Hazard ratios and 95% confidence intervals were derived from partially adjusted models that included age, care home residence, health and social care worker status, housebound status, receipt of end-of-life care, setting (urban/rural), sex, ethnicity, IMD quintile, prior SARS-CoV-2 infection, immunosuppression, and haematologic cancer. Data are redacted [R] for any rows in which there were $>0$ and $\leq 10$ event or non-event counts after rounding to the nearest 5, with non-event counts calculated among uncensored individuals. CEV, clinically extremely vulnerable; CKD, chronic kidney disease; CND, chronic neurological disease; IMD, index of multiple deprivation; [N], covariate absent in all individuals by definition; [R] redacted; RRT, renal replacement therapy; Tx, transplant. |      |                  |      |                  |      |                  |     |     |     |     |

Supplementary Table 8. Cumulative 4-dose coverage in subgroups defined by deprivation index, ethnicity, age, and kidney disease severity.

| Characteristic                 | IMD 1 (most deprived) |      |                        |      | IMD 2  |      |                        |      | IMD 3  |      |                        |      | IMD 4  |      |                        |      | IMD 5 (least deprived) |      |                        |      |
|--------------------------------|-----------------------|------|------------------------|------|--------|------|------------------------|------|--------|------|------------------------|------|--------|------|------------------------|------|------------------------|------|------------------------|------|
|                                | White                 |      | Minority ethnic groups |      | White  |      | Minority ethnic groups |      | White  |      | Minority ethnic groups |      | White  |      | Minority ethnic groups |      | White                  |      | Minority ethnic groups |      |
|                                | N                     | %    | N                      | %    | N      | %    | N                      | %    | N      | %    | N                      | %    | N      | %    | N                      | %    | N                      | %    | N                      | %    |
| <b>All</b>                     | 94295                 | 74.8 | 10880                  | 35.3 | 119075 | 80.8 | 8620                   | 47.8 | 153940 | 84.4 | 6370                   | 56.5 | 153430 | 86.0 | 4310                   | 62.8 | 144625                 | 87.8 | 3205                   | 70.8 |
| <b>Age</b>                     |                       |      |                        |      |        |      |                        |      |        |      |                        |      |        |      |                        |      |                        |      |                        |      |
| 16–64                          | 2805                  | 47.0 | 1190                   | 24.6 | 2860   | 58.5 | 815                    | 32.0 | 3105   | 62.4 | 505                    | 40.1 | 2830   | 66.6 | 340                    | 42.7 | 2360                   | 71.8 | 235                    | 49.9 |
| 65–69                          | 1030                  | 54.1 | 235                    | 29.1 | 1130   | 60.0 | 205                    | 38.1 | 1340   | 64.9 | 130                    | 43.1 | 1275   | 69.5 | 100                    | 47.4 | 1120                   | 72.9 | 65                     | 66.7 |
| 70–74                          | 1635                  | 61.0 | 190                    | 36.2 | 2000   | 70.2 | 165                    | 39.2 | 2400   | 73.8 | 135                    | 44.1 | 2270   | 74.0 | 100                    | 60.9 | 2040                   | 77.3 | 70                     | 63.1 |
| 75–79                          | 25380                 | 76.4 | 2475                   | 37.5 | 31565  | 82.5 | 2175                   | 52.0 | 40160  | 86.2 | 1690                   | 57.3 | 39405  | 88.0 | 1140                   | 65.3 | 36295                  | 89.7 | 920                    | 73.3 |
| 80+                            | 63440                 | 76.2 | 6790                   | 36.5 | 81520  | 81.6 | 5260                   | 49.2 | 106935 | 84.9 | 3915                   | 59.0 | 107650 | 86.2 | 2635                   | 64.5 | 102815                 | 87.8 | 1920                   | 72.1 |
| <b>Kidney disease subgroup</b> |                       |      |                        |      |        |      |                        |      |        |      |                        |      |        |      |                        |      |                        |      |                        |      |
| CKD3a                          | 55615                 | 75.7 | 5845                   | 36.3 | 72130  | 81.7 | 4670                   | 49.1 | 95515  | 85.0 | 3600                   | 57.3 | 97010  | 86.7 | 2460                   | 63.6 | 93065                  | 88.4 | 1920                   | 70.7 |
| CKD3b                          | 28670                 | 74.9 | 2890                   | 35.2 | 35050  | 80.3 | 2330                   | 46.5 | 44240  | 84.1 | 1665                   | 57.9 | 42920  | 85.3 | 1130                   | 62.8 | 39485                  | 86.9 | 790                    | 72.7 |
| CKD4-5                         | 7685                  | 72.0 | 1105                   | 30.8 | 9260   | 77.8 | 805                    | 50.0 | 11155  | 81.6 | 580                    | 51.0 | 10635  | 84.0 | 345                    | 60.3 | 9500                   | 85.9 | 235                    | 67.7 |
| RRT (dial.)                    | 530                   | 60.6 | 235                    | 40.3 | 640    | 73.3 | 165                    | 46.5 | 695    | 79.7 | 110                    | 52.7 | 650    | 80.4 | 70                     | 64.1 | 565                    | 78.4 | 60                     | 55.6 |
| RRT (Tx)                       | 1800                  | 56.7 | 805                    | 30.4 | 2000   | 67.8 | 650                    | 39.7 | 2330   | 75.2 | 415                    | 49.8 | 2215   | 79.5 | 305                    | 54.2 | 2015                   | 81.4 | 200                    | 63.3 |

Cumulative coverage (%) was determined based on Kaplan-Meier estimates, censoring at death, deregistration, or 31<sup>st</sup> August 2022. Minority ethnic groups are combined due to their low combined prevalence within the study population. CKD, chronic kidney disease; dial., dialysis; IMD, index of multiple deprivation quintile; RRT, renal replacement therapy; Tx, transplant.

## Key

|  |        |
|--|--------|
|  | <50%   |
|  | 50–75% |
